# Supplementary material for: Structural Basis of Parasitic HSP90 ATPase Inhibition by Small Molecules
Source: MDPI journal article supplement (doi:10.3390/ph15111341), 2022-10-29
Supplement: s1 [file s1]

# Structural basis of parasitic HSP90 ATP-ase inhibition by small molecules

Giusy Tassone<sup>1</sup>, Marco Mazzorana<sup>2,\*</sup> and Cecilia Pozzi<sup>1,\*</sup>

<sup>1</sup> Department of Biotechnology, Chemistry and Pharmacy, Department of Excellence 2018–2022, University of Siena, Via Aldo Moro 2, 53100 Siena, Italy

<sup>2</sup> Diamond Light Source Ltd., Diamond House, Harwell Science & Innovation Campus, Didcot, Oxfordshire, OX11 0DE, UK.

\* Correspondence: M.M. marco.mazzorana@diamond.ac.uk Tel.: +44 01235 778643; C.P. cecilia.pozzi@unisi.it; Tel.: +39 0577 232132

## Table of contents

|            |    |
|------------|----|
| Figure S1. | S2 |
| Table S1.  | S3 |
| References | S9 |

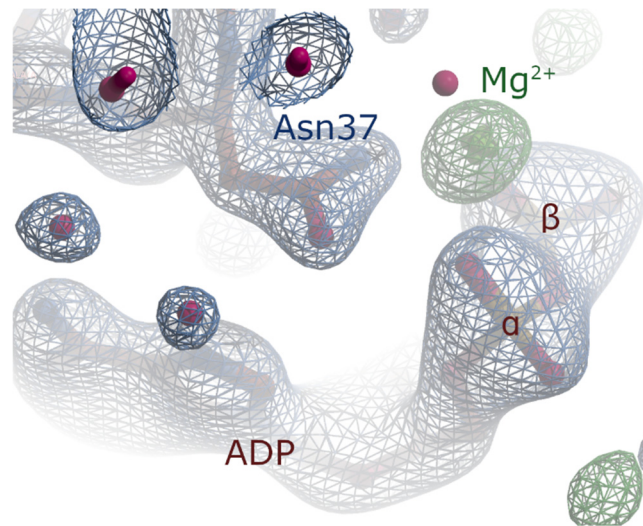

**Figure S1.** Electron density map detail from *Pf*-NTD structure (PDB id 3K60 [1]) reprocessed with PDB-redo (<https://pdb-redo.eu/db/3k60>) [2]. The  $f_0-f_c$  map ( $3\sigma$  level) shows a clear positive density not accounted for between the side chain of Asn37 and the  $\alpha$  and  $\beta$  phosphates of ADP. The green blob, unaccounted for in the original structure, is compatible with the location of  $Mg(II)$  ions in other HSP90 structures.

**Table S1.** HSP90 binding and/or inhibition data and cytotoxicity on parasite and human cells by other natural products and synthetic compounds.

| NATURAL COMPOUNDS | Compound | Structure                                                                          | Parasite HSP90 binding and/or inhibition       | Parasite cytotoxicity                                                                                                                                | Cytotoxicity on human cells                                                       |
|-------------------|----------|------------------------------------------------------------------------------------|------------------------------------------------|------------------------------------------------------------------------------------------------------------------------------------------------------|-----------------------------------------------------------------------------------|
|                   | Harmin   | 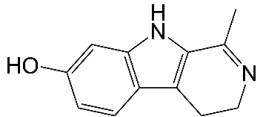  | <i>Pf</i> -NTD $K_d = 0.04$ mM [3]             | N.A. [3]                                                                                                                                             | N.A. [3]                                                                          |
|                   | Harmanol |   | <i>Pf</i> -NTD $K_d = 7.0$ mM [3]              | N.A. [3]                                                                                                                                             | N.A. [3]                                                                          |
|                   | 17A      |   | <i>Pf</i> $IC_{50} = 12.2 \pm 2.3$ $\mu$ M [4] | <i>Pf</i> W2 $IC_{50} = 4.2 \pm 1.3$ $\mu$ M [4]                                                                                                     | HeLa $IC_{50} = 1.1 \pm 0.3$ mM [4]<br>HepG2 $IC_{50} = 0.16 \pm 0.01$ mM [4]     |
|                   | 21A      |  | <i>Pf</i> $IC_{50} = 23.1 \pm 8.8$ $\mu$ M [4] | <i>Pf</i> W2 $IC_{50} = 5.7 \pm 1.7$ $\mu$ M [4]<br><i>Pf</i> MRA-1236 = $9.2 \pm 0.4$ $\mu$ M [4]<br><i>Pf</i> MRA-1240 = $9.6 \pm 2.0$ $\mu$ M [4] | HeLa $IC_{50} = 0.48 \pm 0.14$ mM [4]<br>HepG2 $IC_{50} = 0.140 \pm 0.001$ mM [4] |

|             |                                                                                     |          |                                                                                                                       |                                                 |
|-------------|-------------------------------------------------------------------------------------|----------|-----------------------------------------------------------------------------------------------------------------------|-------------------------------------------------|
| 5e          | 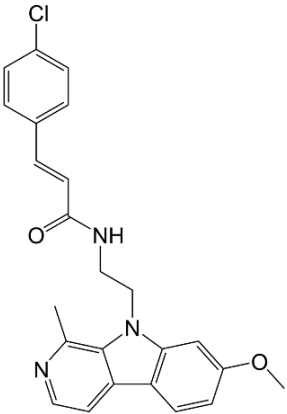   | N.A. [5] | <i>Pf</i> 3D7 $IC_{50} = 0.04 \pm 0.02 \mu\text{M}$<br>[5]<br><i>Pf</i> Dd2 $IC_{50} = 0.17 \pm 0.01 \mu\text{M}$ [5] | HepG2 $IC_{50} = 2.91 \pm 1.75 \mu\text{M}$ [5] |
| Margolonone |    | N.A. [6] | N.A. [6]                                                                                                              | N.A. [6]                                        |
| Nimbione    |    | N.A. [6] | N.A. [6]                                                                                                              | N.A. [6]                                        |
| Nimbinone   |  | N.A. [6] | N.A. [6]                                                                                                              | N.A. [6]                                        |

|    |                                                                                    |                                             |                                                                                                                                                                                                                  |                                                                                                                       |
|----|------------------------------------------------------------------------------------|---------------------------------------------|------------------------------------------------------------------------------------------------------------------------------------------------------------------------------------------------------------------|-----------------------------------------------------------------------------------------------------------------------|
| CE | 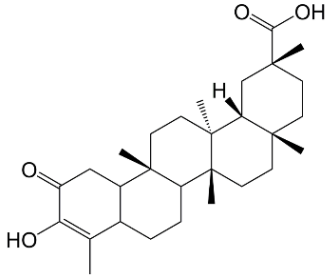  | $Lb\ IC_{50} = 210 \pm 10\ \mu\text{M}$ [7] | $Li\ \text{Promatigotes } IC_{50} = 0.21 \pm 0.07\ \mu\text{M}$ [7]<br>$Lt\ \text{Promatigotes } IC_{50} = 0.49 \pm 0.17\ \mu\text{M}$ [7]                                                                       | $\text{HMEC-1 } IC_{50} = 0.38 \pm 0.08\ \mu\text{M}$ [7]<br>$\text{THP-1 } IC_{50} = 0.90 \pm 0.30\ \mu\text{M}$ [7] |
| 1  |   | $Lb\ IC_{50} = 83 \pm 2\ \mu\text{M}$ [7]   | $Li\ \text{Promatigotes } IC_{50} = 0.06 \pm 0.02\ \mu\text{M}$ [7]<br>$Lt\ \text{Promatigotes } IC_{50} = 0.09 \pm 0.03\ \mu\text{M}$ [7]<br>$Lt\ \text{Amastogotes } IC_{50} = 0.19 \pm 0.11\ \mu\text{M}$ [7] | $\text{HMEC-1 } IC_{50} = 0.51 \pm 0.08\ \mu\text{M}$ [7]<br>$\text{THP-1 } IC_{50} = 2.08 \pm 0.24\ \mu\text{M}$ [7] |
| 3  |   | $Lb\ IC_{50} = 81 \pm 1\ \mu\text{M}$ [7]   | $Li\ \text{Promatigotes } IC_{50} = 0.06 \pm 0.01\ \mu\text{M}$ [7]<br>$Lt\ \text{Promatigotes } IC_{50} = 0.08 \pm 0.04\ \mu\text{M}$ [7]<br>$Lt\ \text{Amastogotes } IC_{50} = 0.13 \pm 0.09\ \mu\text{M}$ [7] | $\text{HMEC-1 } IC_{50} = 0.53 \pm 0.17\ \mu\text{M}$ [7]<br>$\text{THP-1 } IC_{50} = 2.79 \pm 0.44\ \mu\text{M}$ [7] |
| 5  |  | $Lb\ IC_{50} = 20 \pm 2\ \mu\text{M}$ [7]   | $Li\ \text{Promatigotes } IC_{50} = 0.12 \pm 0.02\ \mu\text{M}$ [7]<br>$Lt\ \text{Promatigotes } IC_{50} = 0.12 \pm 0.05\ \mu\text{M}$ [7]<br>$Lt\ \text{Amastogotes } IC_{50} = 0.52 \pm 0.28\ \mu\text{M}$ [7] | $\text{HMEC-1 } IC_{50} = 0.12 \pm 0.03\ \mu\text{M}$ [7]<br>$\text{THP-1 } IC_{50} = 1.88 \pm 0.34\ \mu\text{M}$ [7] |

6

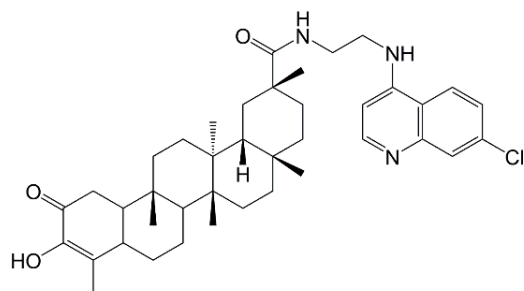*Lb*  $IC_{50} = 65 \pm 4 \mu\text{M}$  [7]*Li* Promatigotes  $IC_{50} = 0.09 \pm 0.03 \mu\text{M}$  [7]*Lt* Promatigotes  $IC_{50} = 0.14 \pm 0.03 \mu\text{M}$  [7]*Lt* Amastogotes  $IC_{50} = 0.66 \pm 0.06 \mu\text{M}$  [7]HMEC-1  $IC_{50} = 0.40 \pm 0.03 \mu\text{M}$  [7]THP-1  $IC_{50} = 0.85 \pm 0.24 \mu\text{M}$  [7]

5B

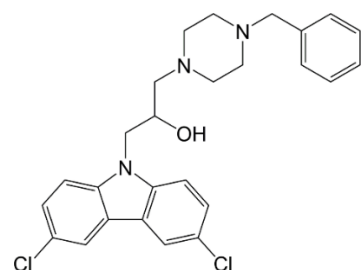*Pf*-HSP90  $K_d = 28.1 \mu\text{M}$  [8]*Pf*  $IC_{50} = 82 \text{ nM}$  [8]

N.A. [8]

Compound D

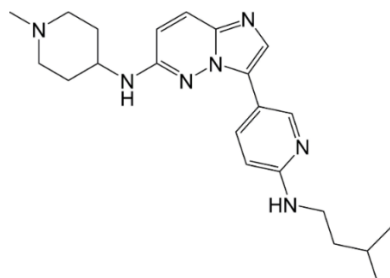*Pf*-HSP90  $K_d = 6.17 \mu\text{M}$  [9]*Pf*-HSP90-NTD  $K_d = 10.73 \mu\text{M}$  [9]

N.A. [9]

N.A. [9]

Glb08

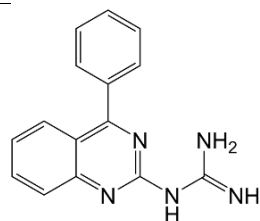*Lb*  $IC_{50} = 30 \pm 1 \mu\text{M}$  [10]*Lb*-HSP90  $K_{Dapp} = 13 \pm 4 \mu\text{M}$  [10]*Lb*-NTD  $K_{Dapp} = 17 \pm 6 \mu\text{M}$  [10]*Lb*  $IC_{50} = 43 \pm 2 \mu\text{M}$  [10]

N.A. [10]

|            |                                                                                     |                                                                                                                                                                 |                                            |           |
|------------|-------------------------------------------------------------------------------------|-----------------------------------------------------------------------------------------------------------------------------------------------------------------|--------------------------------------------|-----------|
| Glb15      | 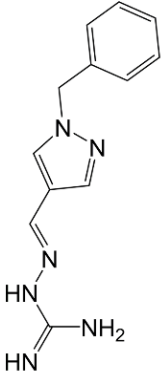    | $Lb\ IC_{50} = 36 \pm 1\ \mu\text{M}$ [10]<br>$Lb\text{-HSP90}\ K_{Dapp} = 14 \pm 4\ \mu\text{M}$ [10]<br>$Lb\text{-NTDK}_{Dapp} = 13 \pm 3\ \mu\text{M}$ [10]  | $Lb\ IC_{50} = 71 \pm 2\ \mu\text{M}$ [10] | N.A. [10] |
| Glb23      |    | $Lb\ IC_{50} = 35 \pm 1\ \mu\text{M}$ [10]<br>$Lb\text{-HSP90}\ K_{Dapp} = 26 \pm 7\ \mu\text{M}$ [10]<br>$Lb\text{-NTDK}_{Dapp} = 20 \pm 10\ \mu\text{M}$ [10] | $Lb\ IC_{50} = > 100\ \mu\text{M}$ [10]    | N.A. [10] |
| PU-H71     |    | $Pf\text{-NTD}\ K_d = 70.8 \pm 0.006\ \mu\text{M}$ [11]                                                                                                         | $Pf\ IC_{50} = 111\ \text{nM}$ [11]        | N.A. [11] |
| Compound 1 |   | $Tc\text{-NTD}\ K_d = 9 \pm 2\ \text{nM}$ [12]                                                                                                                  | $Tc\ IC_{50} = 0.31\ \mu\text{M}$ [12]     | N.A. [12] |
| Compound 3 |  | $Tc\text{-NTD}\ K_d = 26 \pm 9\ \text{nM}$ [12]                                                                                                                 | $Tc\ IC_{50} = 0.21\ \mu\text{M}$ [12]     | N.A. [12] |

|            |                                                                                   |                                                    |                                                       |           |
|------------|-----------------------------------------------------------------------------------|----------------------------------------------------|-------------------------------------------------------|-----------|
| Compound 4 | 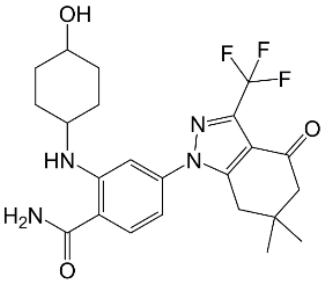  | $T_C\text{-NTD } K_d = 3 \pm 1 \text{ nM}$<br>[12] | $T_C \text{ IC}_{50} = 0.10 \text{ }\mu\text{M}$ [12] | N.A. [12] |
| D1U        |  | N.A.                                               | N.A.                                                  | N.A.      |

N.A = Not Available



## References

1. Corbett, K.D.; Berger, J.M. Structure of the ATP-Binding Domain of Plasmodium Falciparum Hsp90. *Proteins* **2010**, *78*, 2738–2744, doi:10.1002/prot.22799.
2. Joosten, R.P.; Long, F.; Murshudov, G.N.; Perrakis, A. The PDB\_REDO Server for Macromolecular Structure Model Optimization. *IUCrJ* **2014**, *1*, 213–220, doi:10.1107/S2052252514009324.
3. Shahinas, D.; Macmullin, G.; Benedict, C.; Crandall, I.; Pillai, D.R. Harmine Is a Potent Antimalarial Targeting Hsp90 and Synergizes with Chloroquine and Artemisinin. *Antimicrob Agents Chemother* **2012**, *56*, 4207–4213, doi:10.1128/AAC.00328-12.
4. Bayih, A.G.; Folefoc, A.; Mohon, A.N.; Eagon, S.; Anderson, M.; Pillai, D.R. In Vitro and in Vivo Anti-Malarial Activity of Novel Harmine-Analog Heat Shock Protein 90 Inhibitors: A Possible Partner for Artemisinin. *Malar J* **2016**, *15*, 579, doi:10.1186/s12936-016-1625-7.
5. Marinović, M.; Perković, I.; Fontinha, D.; Prudêncio, M.; Held, J.; Pessanha de Carvalho, L.; Tandarić, T.; Vianello, R.; Zorc, B.; Rajić, Z. Novel Harmicines with Improved Potency against Plasmodium. *Molecules* **2020**, *25*, doi:10.3390/molecules25194376.
6. Daniyan, M.O.; Ojo, O.T. In Silico Identification and Evaluation of Potential Interaction of Azadirachta Indica Phytochemicals with Plasmodium Falciparum Heat Shock Protein 90. *Journal of Molecular Graphics and Modelling* **2019**, *87*, 144–164, doi:10.1016/j.jmgm.2018.11.017.
7. Bassanini, I.; Parapini, S.; Ferrandi, E.E.; Gabriele, E.; Basilico, N.; Taramelli, D.; Sparatore, A. Design, Synthesis and In Vitro Investigation of Novel Basic Celastrol Carboxamides as Bio-Inspired Leishmanicidal Agents Endowed with Inhibitory Activity against Leishmania Hsp90. *Biomolecules* **2021**, *11*, doi:10.3390/biom11010056.
8. Wang, T.; Mäser, P.; Picard, D. Inhibition of Plasmodium Falciparum Hsp90 Contributes to the Antimalarial Activities of Aminoalcohol-Carbazoles. *J Med Chem* **2016**, *59*, 6344–6352, doi:10.1021/acs.jmedchem.6b00591.
9. Green, J.L.; Moon, R.W.; Whalley, D.; Bowyer, P.W.; Wallace, C.; Rochani, A.; Nageshan, R.K.; Howell, S.A.; Grainger, M.; Jones, H.M.; et al. Imidazopyridazine Inhibitors of Plasmodium Falciparum Calcium-Dependent Protein Kinase 1 Also Target Cyclic GMP-Dependent Protein Kinase and Heat Shock Protein 90 To Kill the Parasite at Different Stages of Intracellular Development. *Antimicrob Agents Chemother* **2015**, *60*, 1464–1475, doi:10.1128/AAC.01748-15.
10. Batista, F.A.H.; Ramos, S.L.; Tassone, G.; Leitão, A.; Montanari, C.A.; Botta, M.; Mori, M.; Borges, J.C. Discovery of Small Molecule Inhibitors of Leishmania Braziliensis Hsp90 Chaperone. *J Enzyme Inhib Med Chem* **2020**, *35*, 639–649, doi:10.1080/14756366.2020.1726342.
11. Shahinas, D.; Folefoc, A.; Taldone, T.; Chiosis, G.; Crandall, I.; Pillai, D.R. A Purine Analog Synergizes with Chloroquine (CQ) by Targeting Plasmodium Falciparum Hsp90 (PfHsp90). *PLoS ONE* **2013**, *8*, e75446, doi:10.1371/journal.pone.0075446.
12. Pizarro, J.C.; Hills, T.; Senisterra, G.; Wernimont, A.K.; Mackenzie, C.; Norcross, N.R.; Ferguson, M.A.J.; Wyatt, P.G.; Gilbert, I.H.; Hui, R. Exploring the Trypanosoma Brucei Hsp83 Potential as a Target for Structure Guided Drug Design. *PLOS Neglected Tropical Diseases* **2013**, *7*, e2492, doi:10.1371/journal.pntd.0002492.
